# Supplementary material for: SA3C-ID: a novel network intrusion detection model using feature selection and adversarial training
Source: PeerJ journal article supplement (doi:10.7717/peerj-cs.3089), 2025-07-31
Supplement: RawdataAndCode.zip [file RawdataAndCode.zip]

## Sheet: NSL-KDD
	Predicted as Normal	Predicted as DOS	Predicted as Probe	Predicted as R2L	Predicted as U2R
Actual as Normal	9351	385	196	753	186
Actual as DOS	52	6527	142	2	13
Actual as Probe	158	134	1721	13	85
Actual as R2L	75	381	451	1684	43
Actual as U2R	17	1	33	61	79

## Sheet: CICIDS2018
	Predicted as Benign	Predicted as DDOS	Predicted as DOS	Predicted as Bot	Predicted as BruteForce	Predicted as Infiltration	Predicted as WebAttack
Actual as Benign	1982241	145	195	53	1	19136	20924
Actual as DDOS	74	168124	7983	73	13271	33	28
Actual as DOS	143	4907	90784	45	2103	82	91
Actual as Bot	25	135	329	41275	529	57	563
Actual as BruteForce	6	2275	694	50	53879	137	116
Actual as Infiltration	9032	58	62	33	73	14862	175
Actual as WebAttack	35	0	0	1	0	2	88
